# Supplementary material for: Photosensitizing properties of biopterin and its photoproducts using 2′-deoxyguanosine 5′-monophosphate as an oxidizable target
Source: Royal Society of Chemistry journal article supplement (doi:10.1039/c2cp41476g), 2012-01-01
Supplement: c2cp41476g.pdf [file c2cp41476g.pdf]

## Electronic Supplementary Information

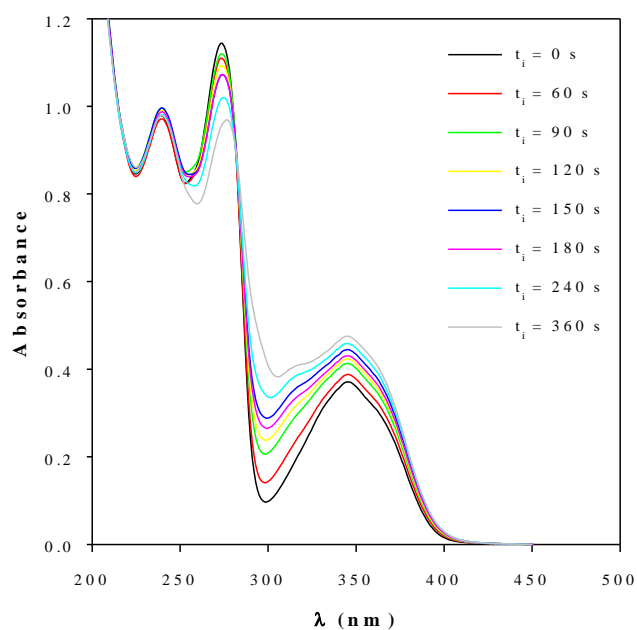

**Figure S1.**

Evolution of the absorption spectra of air-equilibrated solutions of dGMP ( $60 \mu\text{M}$ ) in the presence of Bip ( $140 \mu\text{M}$ ), as a function of the irradiation time ( $t_i$ ). pH = 5.7; arrows indicate the changes observed at different wavelengths, optical path length = 4 mm.

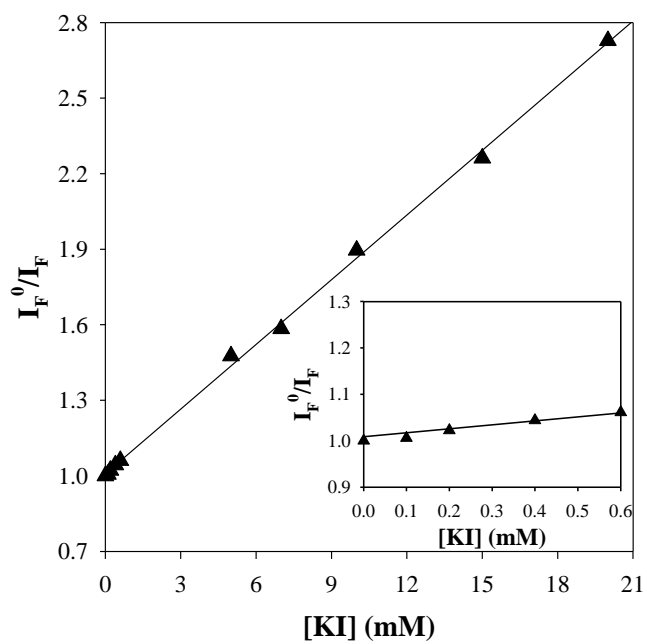

**Figure S2.**

Quenching of the fluorescence of Fop by  $I^-$ . Stern-Volmer plots of the fluorescence intensities ( $I_F$ ).  $\lambda_{exc} = 350$  nm;  $[Fop] = 12$   $\mu$ M, pH 5.5.

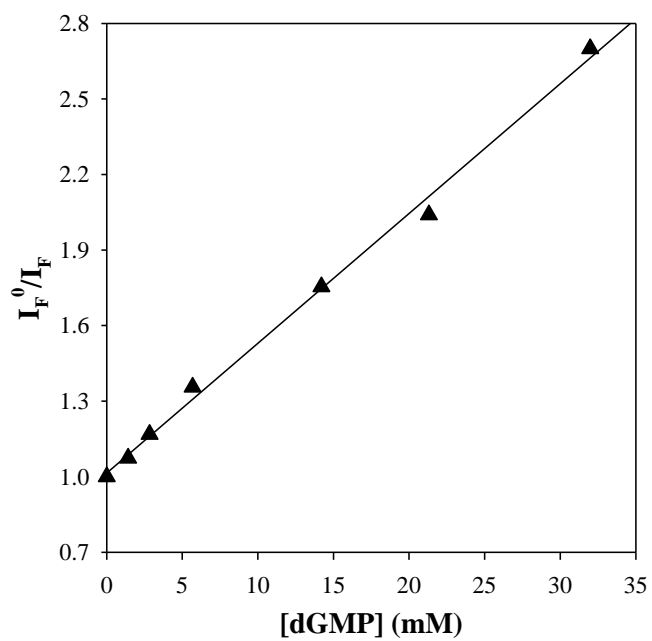

**Figure S3.**

Quenching of the fluorescence of Bip by dGMP. Stern–Volmer plots of the fluorescence intensities ( $I_F$ ).  $\lambda_{\text{exc}} = 350 \text{ nm}$ ;  $[\text{Bip}] = 16 \text{ }\mu\text{M}$ , pH 5.5.
